# Supplementary material for: Precision cell-free DNA extraction for liquid biopsy by integrated microfluidics
Source: PubMed Central journal article supplement (PMC7039987; doi:10.1038/s41698-019-0107-0), 2020-02-24
Supplement: 41698_2019_107_MOESM1_ESM.pdf [file 41698_2019_107_MOESM1_ESM.pdf]

## Supplementary information

### Centrifugation-free cfDNA extraction in a microfluidic chip using immiscible reagent and vacuum for liquid biopsy of cancer

Hoyoon Lee<sup>1</sup>, Chanhee Park<sup>1</sup>, Wonhwi Na<sup>2</sup>, Kyong Hwa Park<sup>3</sup> and Sehyun Shin<sup>1</sup>

<sup>1</sup>School of Mechanical Engineering, Korea University, Seoul 02841, Republic of Korea

<sup>2</sup>Department of Micro/Nano Systems, Korea University, Seoul 02841, Republic of Korea

<sup>3</sup>Division of Oncology/Hematology, Department of Internal Medicine, Korea University College of Medicine, Seoul 02841, Republic of Korea

Correspondence: Sehyun Shin (lexerdshin@korea.ac.kr)

Hoyoon Lee and Chanhee Park contributed equally to this work.

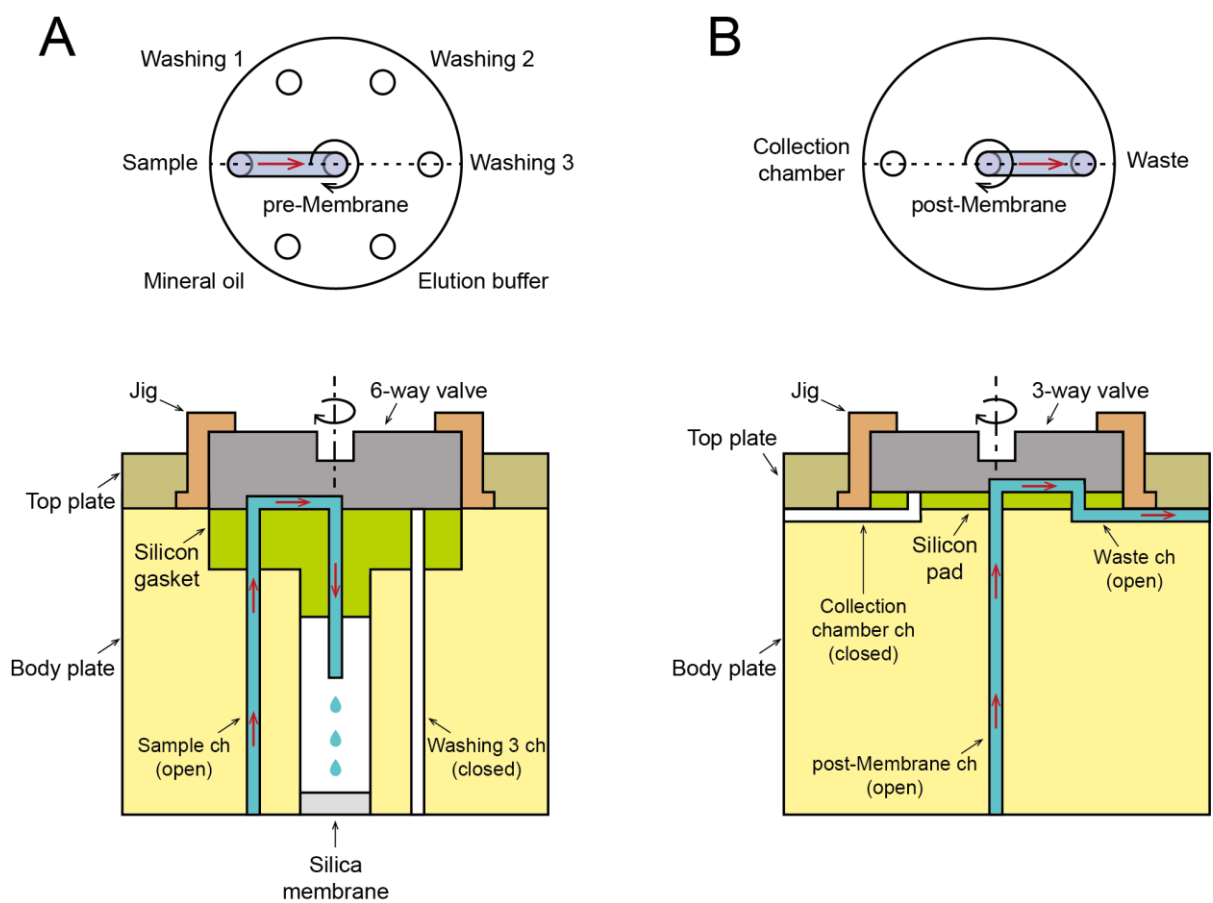

**Fig. S1** Schematic images of microfluidic valves in the PIBEX chip. A) Top view shows a schematic image for the microfluidic 6-way selection valve (top) and section view at dotted line in top view (bottom). B) Top view shows a schematic image for the microfluidic switch valve (top) and section view at dotted line in top view (bottom). Red arrows indicate flow direction in a channel.

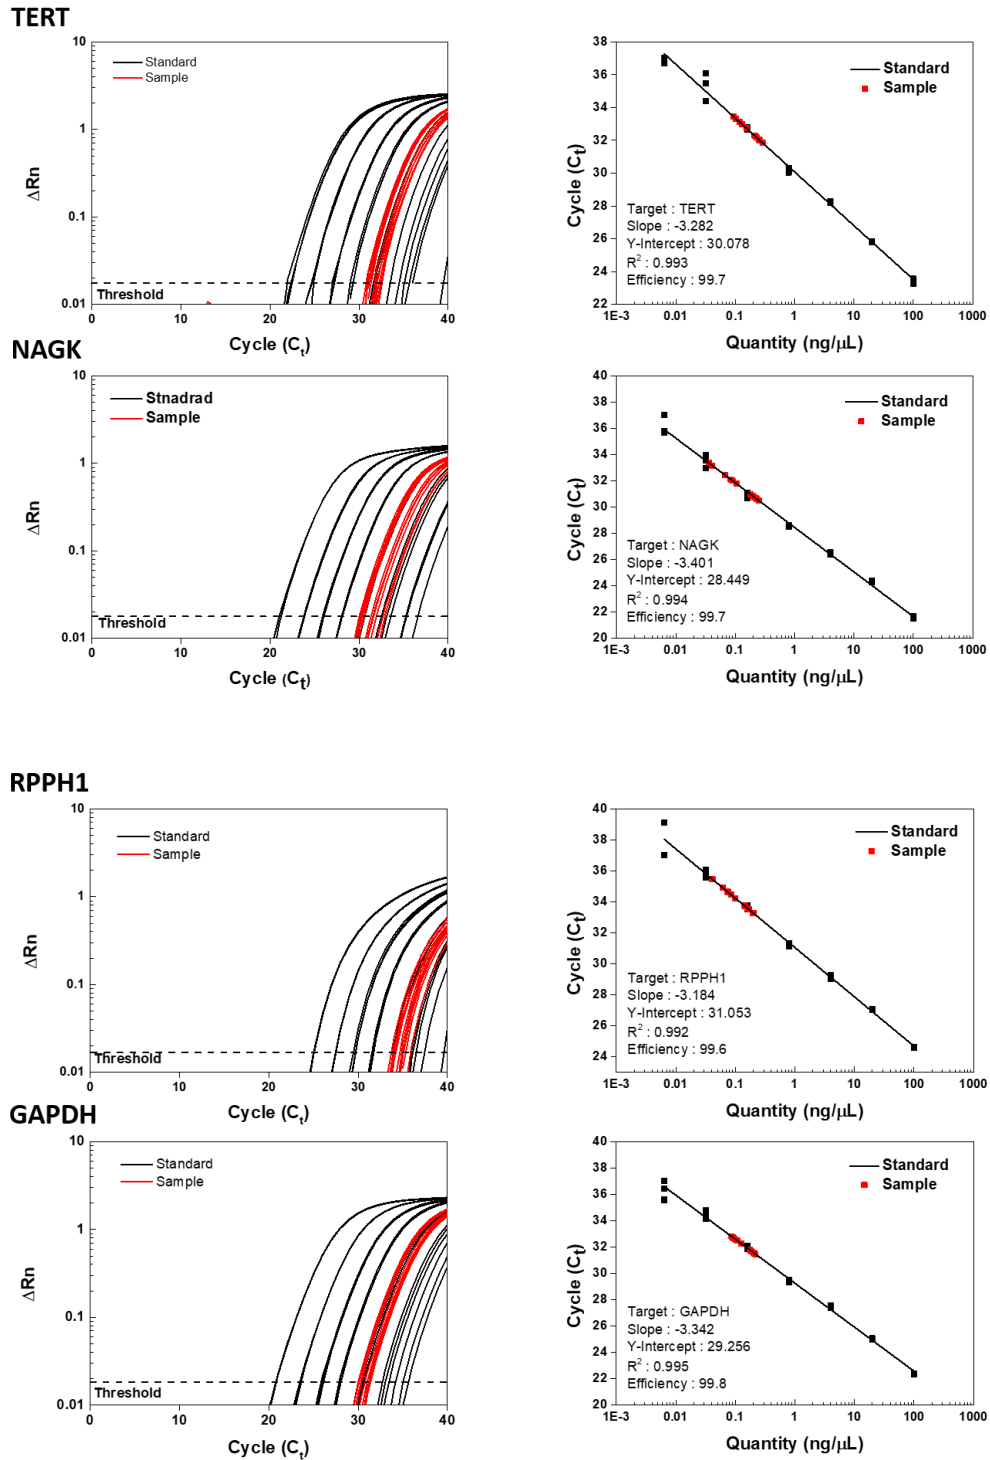

**Fig. S2** Amplification plots and standard curves in the real-time PCR assay. Amplification plots (left) and standard curves (right) of *TERT*, *NAGK*, *RPPH1*, and *GAPDH*.

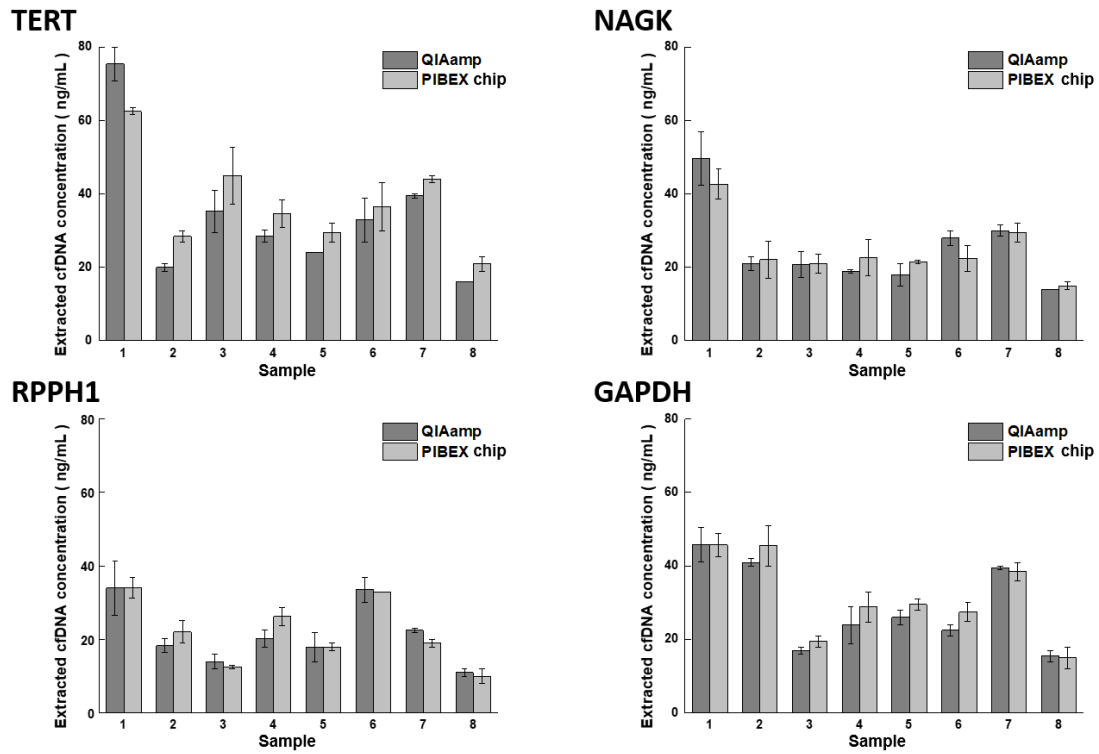

**Fig. S3** Real-time PCR results with the four reference genes. Levels of *TERT*, *NAGK*, *RPPH1*, and *GAPDH* in cfDNA extracted by QIAamp or PIBEX chip.

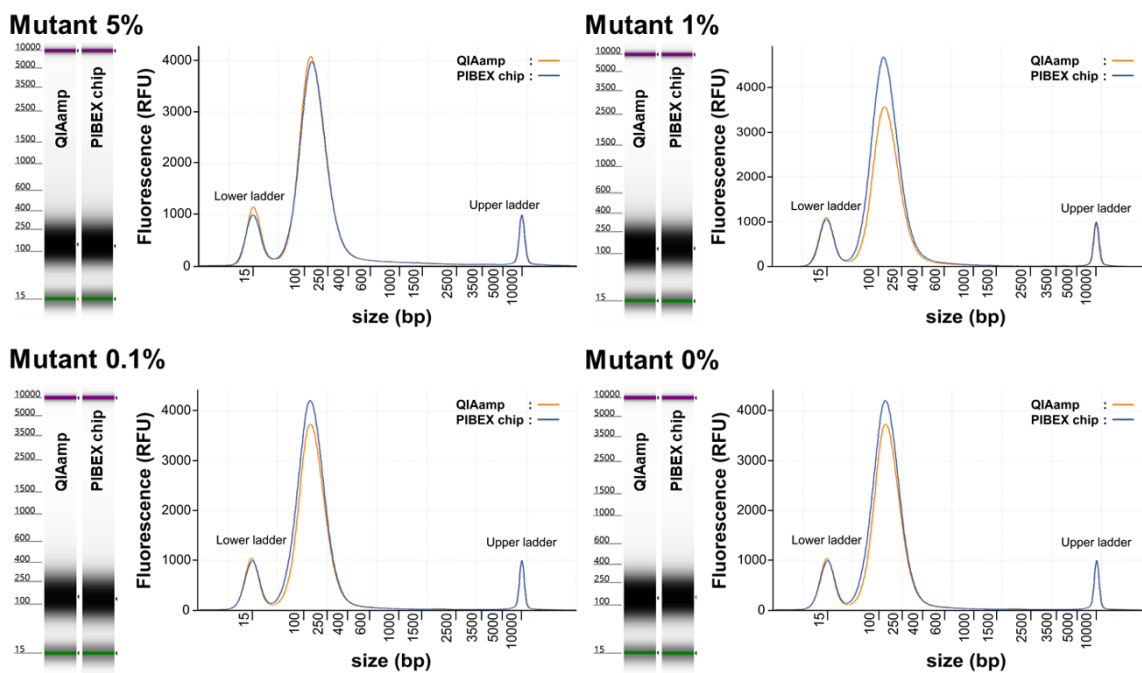

**Fig. S4** Quality test of the cfDNA reference set. Quality test of the cfDNA reference set in synthetic plasma measured by microelectrophoresis.

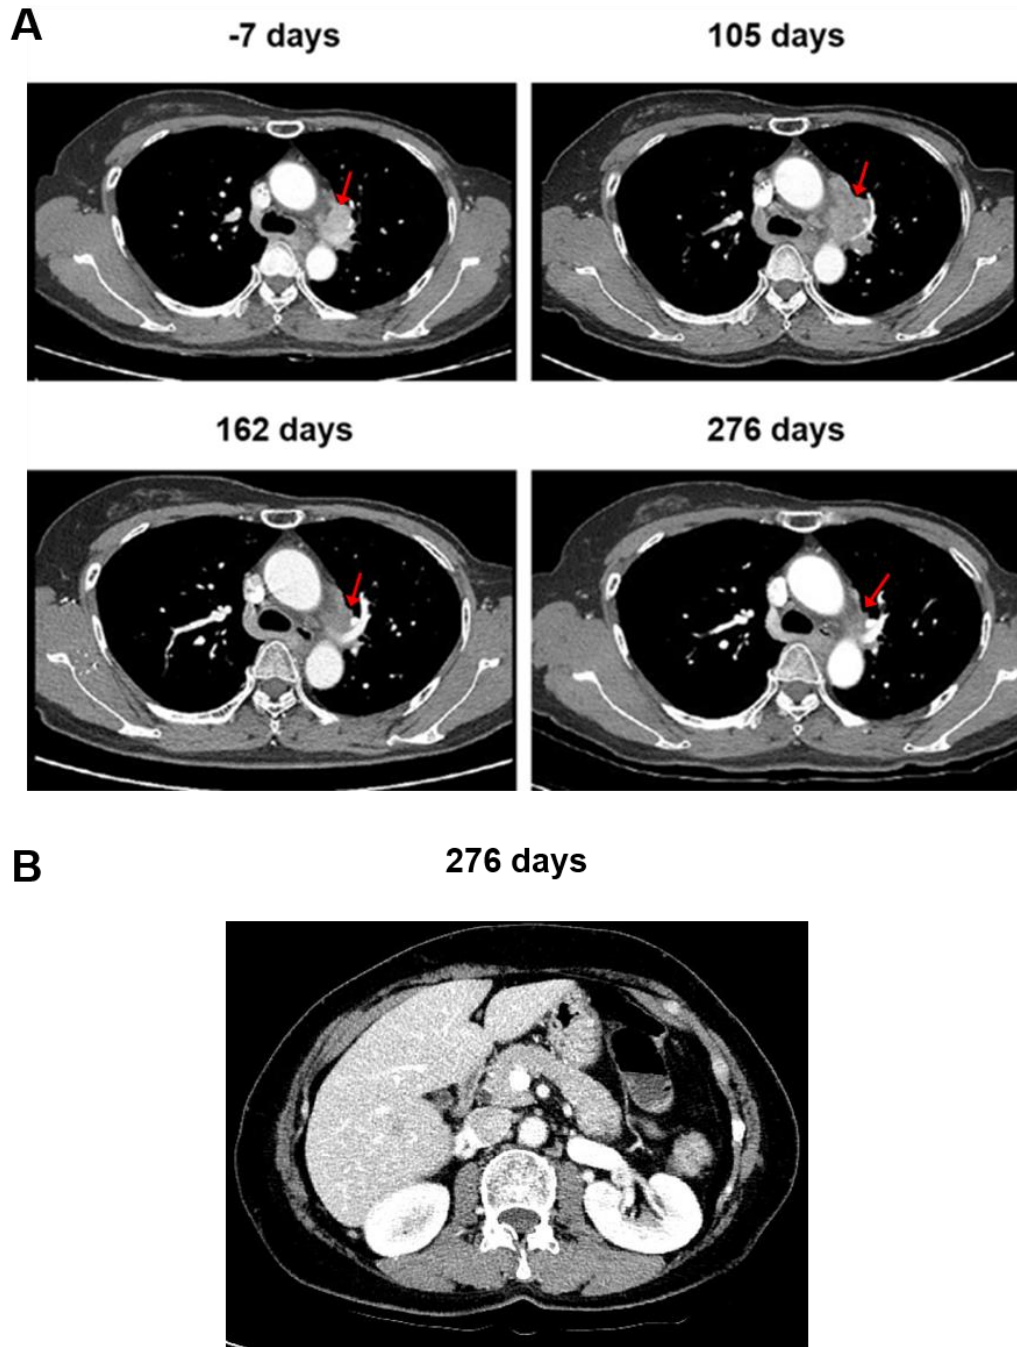

**Fig. S5** CT images of *HER-2* type of breast cancer patient. A) Chest CT images from -7 days to 276 days. Red arrows indicate lymph nodes. B) Abdominal CT image at 276 days.

**Table S1** Characteristics of study subjects.

| <b>Healthy controls for real-time PCR assay</b> |                |            |              |                 |                      |
|-------------------------------------------------|----------------|------------|--------------|-----------------|----------------------|
| <b>Characteristic</b>                           |                |            | <b>Value</b> |                 |                      |
| <b>Age, years</b>                               |                |            |              |                 |                      |
| Average                                         |                |            | 26.8         |                 |                      |
| Range                                           |                |            | 21–35        |                 |                      |
| <b>Gender</b>                                   |                |            |              |                 |                      |
| Male                                            |                |            | 1            |                 |                      |
| Female                                          |                |            | 7            |                 |                      |
| <b>Blood type</b>                               |                |            |              |                 |                      |
| A+                                              |                |            | 1            |                 |                      |
| B+                                              |                |            | 1            |                 |                      |
| O+                                              |                |            | 6            |                 |                      |
| AB+                                             |                |            | 0            |                 |                      |
| <b>Clinical sample for ddPCR assay</b>          |                |            |              |                 |                      |
| <b>ID</b>                                       | <b>Disease</b> | <b>Sex</b> | <b>Age</b>   | <b>TKI type</b> | <b>TNM (initial)</b> |
| BP024                                           | Breast cancer  | Female     | 58           | HER-2+          | pT1cN1M0             |

**Table S2** PCR assay information for the standard cfDNA sample.

| <b>Gene Symbol /<br/>Assay name</b> | <b>Location</b> | <b>Primer/Probe sequence</b> | <b>Primer / probe<br/>(<math>\mu</math>M)</b> |
|-------------------------------------|-----------------|------------------------------|-----------------------------------------------|
| 180 bp Lambda<br>DNA primer         | 3704 – 3884     | F: CCTCACATAAATGCTACCAAAC    | 0.25                                          |
|                                     |                 | R: TTCCAAGAAGGAGGCCATAGTC    | 0.25                                          |



**Table S3** Real-time PCR assay information.

| Gene Symbol / Assay name | Genome loci | Location                                               | Primer/Probe sequence          | Primer / probe ( $\mu$ M) | Probe fluorophore / quencher |
|--------------------------|-------------|--------------------------------------------------------|--------------------------------|---------------------------|------------------------------|
| <i>TERT</i>              | 5p15.33     | NC_000005.9<br>(1253282.. 1295178,<br>complement)      | F: CCTCACATAAATGCTACCAAAC      | 0.9                       | FAM / BHQ-1                  |
|                          |             |                                                        | R: TTCCAAGAAGGAGGCCATAGTC      | 0.9                       |                              |
|                          |             |                                                        | P: AAGAAATGAACAGACCCATCCCCCAGG | 0.25                      |                              |
| <i>RPPHI</i>             | 14q11.2     | NC_000014.8<br>(20811230..<br>20811570,<br>complement) | F: GCGGAGGGAAGCTCATCAG         | 0.9                       | FAM / BHQ-1                  |
|                          |             |                                                        | R: GGACATGGGAGTGGAGTGACA       | 0.9                       |                              |
|                          |             |                                                        | P: CACGAGCTGAGTGCG             | 0.2                       |                              |
| <i>GAPDH</i>             | 12p13       | NC_000012.11<br>(6643585..<br>6647537)                 | F: AGGTTTACATGTTCCAATATGATTCCA | 0.45                      | FAM / BHQ-1                  |
|                          |             |                                                        | R: ATGGGATTTCATTGATGACAAG      | 0.45                      |                              |
|                          |             |                                                        | P: CCGTTCTCAGCCTTGACGGTGC      | 0.225                     |                              |
| <i>NAGK</i>              | 2p13.3      | NC_000002.11<br>(71295408..<br>71305998)               | F : TGGGCAGACACATCGTAGCA       | 0.2                       | FAM / BHQ-1                  |
|                          |             |                                                        | R : CACCTTCACTCCCACCTCAAC      | 0.2                       |                              |
|                          |             |                                                        | P : TGTTGCCCGAGATTGACCCGGT     | 0.1                       |                              |

**Table S4** Allelic frequency verification data in the cfDNA reference standard set in synthetic plasma.

| Gene          | Variant         | 5%              |           |               | 1%              |           |               | 0.1%            |           |               | 0%              |           |               |
|---------------|-----------------|-----------------|-----------|---------------|-----------------|-----------|---------------|-----------------|-----------|---------------|-----------------|-----------|---------------|
|               |                 | Expected AF (%) | WT copies | Mutant copies | Expected AF (%) | WT copies | Mutant copies | Expected AF (%) | WT copies | Mutant copies | Expected AF (%) | WT copies | Mutant copies |
| <i>EGFR</i>   | L858R           | 5.0             | 93120     | 4768          | 1.0             | 103520    | 1104          | 0.10            | 105600    | 128           | 0               | 106720    | 8             |
| <i>EGFR</i>   | delE745-A750    | 5.0             | 54240     | 3328          | 1.0             | 66880     | 880           | 0.10            | 61440     | 72            | 0               | 62560     | 0             |
| <i>EGFR</i>   | T790M           | 5.0             | 47360     | 2568          | 1.0             | 56480     | 592           | 0.10            | 54400     | 88            | 0               | 55520     | 24            |
| <i>EGFR</i>   | V769-D770insASV | 5.0             | 45552     | 2080          | 1.0             | 53920     | 528           | 0.10            | 53280     | 40            | 0               | 54560     | 0             |
| <i>KRAS</i>   | G12D            | 6.3             | 75520     | 4880          | 1.3             | 86720     | 1200          | 0.13            | 82400     | 136           | 0               | 82080     | 8             |
| <i>NRAS</i>   | Q61K            | 6.3             | 79200     | 5280          | 1.3             | 92160     | 1248          | 0.13            | 94400     | 128           | 0               | 87840     | 0             |
| <i>NRAS</i>   | A59T            | 6.3             | 90560     | 6192          | 1.3             | 110560    | 1600          | 0.13            | 105120    | 176           | 0               | 106080    | 16            |
| <i>PIK3CA</i> | E545K           | 6.3             | 80160     | 5184          | 1.3             | 91520     | 1184          | 0.13            | 88320     | 120           | 0               | 88640     | 8             |

**Table S5** Monitoring results of ctDNA in NGS analysis.

| Sample   | Gene          | Nucleotide change<br>(Amino acid change) | Allele frequency<br>(Mutant/Total) | Exonic effect      | Clinical significance                        |
|----------|---------------|------------------------------------------|------------------------------------|--------------------|----------------------------------------------|
| Baseline | <i>PIK3CA</i> | c.3140A>G<br>(H1047R)                    | 9.15%<br>(14/153)                  | Missense variant   | Pathogenic                                   |
|          | <i>EGFR</i>   | c.2471G>A<br>(G824D)                     | 0.51%<br>(10/1957)                 | Missense variant   | Drug response                                |
|          | <i>NOTCH1</i> | c.3249C>T                                | 47.03%<br>(111/236)                | Synonymous variant | Benign                                       |
|          | <i>APC</i>    | c.6363_6365de<br>ITGC<br>(A2122del)      | 1.17%<br>(3/256)                   | In-frame variant   | Uncertain significance                       |
| 420 days | <i>PIK3CA</i> | c.3140A>G<br>(H1047R)                    | 37.72%<br>(195/517)                | Missense variant   | Pathogenic                                   |
|          | <i>NOTCH1</i> | c.3249C>T                                | 59.71%<br>(544/911)                | Synonymous variant | Benign                                       |
|          | <i>ATM</i>    | c.3077+4G>A                              | 0.76%<br>(6/785)                   | Intron variant     | Conflicting interpretations of pathogenicity |
|          | <i>ALK</i>    | c.875G>A<br>(R292H)                      | 0.29%<br>(9/3102)                  | Missense variant   | Uncertain significance                       |
| 570 days | <i>PIK3CA</i> | c.3140A>G<br>(H1047R)                    | 41.10%<br>(179/436)                | Missense variant   | Pathogenic                                   |

**Table S6** Genes analyzed by Axen Cancer Panel 1.

| SNV / InDel (88 genes)                                                                                                                                                                                                                                                                                                                                                                                                                                                                                                                                                                       | Fusion (3 genes)             |
|----------------------------------------------------------------------------------------------------------------------------------------------------------------------------------------------------------------------------------------------------------------------------------------------------------------------------------------------------------------------------------------------------------------------------------------------------------------------------------------------------------------------------------------------------------------------------------------------|------------------------------|
| <p><i>ABL1, AKT1, AKT3, ALK, APC, AR, ATM, AXL, BRAF, BRCA1, BRCA2, CCND1, CDH1, CDK4, CDK6, CDKN2A, CEBPA, CSF1R, CTNNB1, DDR2, EGFR, ERBB2, ERBB3, ERBB4, ERG, ESRI, ETV1, ETV4, ETV5, EZH2, FANCA, FANCC, FANCF, FANCG, FBXW7, FGFR1, FGFR2, FGFR3, FGFR4, FLT3, FOXL2, GNAI1, GNAQ, GNAS, HNF1A, HRAS, IDH1, IDH2, JAK1, JAK2, JAK3, KDR, KIT, KRAS, MAP2K1, MAP2K2, MAP2K4, MET, MLH1, MPL, MTOR, MYC, MYCN, NOTCH1, NPM1, NRAS, NTRK1, NTRK2, NTRK3, PDGFRA, PIK3CA, PIK3R1, PPARG, PTEN, PTPN11, RAF1, RBI, RET, ROS1, RUNX1, SMAD4, SMARCB1, SMO, SRC, STK11, TP53, VHL, WT1</i></p> | <p><i>ALK, RET, ROS1</i></p> |
